# Supplementary material
Source: Royal Society of Chemistry journal article supplement (doi:10.1039/d6nr00178e)
Supplement: d6nr00178e1.pdf [file d6nr00178e1.pdf]

## Supporting Information

### **Black Wattle Tannin Nanoparticles as Recyclable, Efficient Polyphenol-based Emulsifiers for Enhanced Oil Recovery**

Tong Shao<sup>1,†</sup>, Kunpeng Gu<sup>1,2,†</sup>, Zijun Zhu<sup>1</sup>, Lantao He<sup>1</sup>, Jianwu Lan<sup>1</sup>, Shaojian Lin<sup>1</sup>,  
Jiaojiao Shang<sup>1,3,\*</sup>

<sup>1</sup>College of Biomass Science and Engineering, Sichuan University, Chengdu, Sichuan 610065, China.

<sup>2</sup>National Key Laboratory of Advanced Polymer Materials, Sichuan University, Chengdu, Sichuan 610065, China.

<sup>3</sup>National Engineering Laboratory for Clean Technology of Leather Manufacture, Sichuan University, Chengdu, Sichuan 610065, China.

† Tong Shao, Kunpeng Gu contributed equally to this work

\*Corresponding author: [jiaoj.shang@scu.edu.cn](mailto:jiaoj.shang@scu.edu.cn) (J.S.)

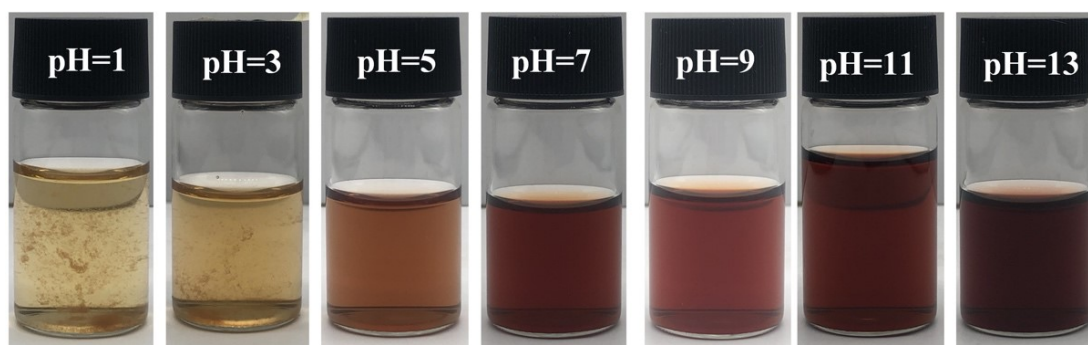

**Figure S1.** Dispersion stability of BWTNPs solution under different pH conditions (mass concentration of 0.08 wt%).

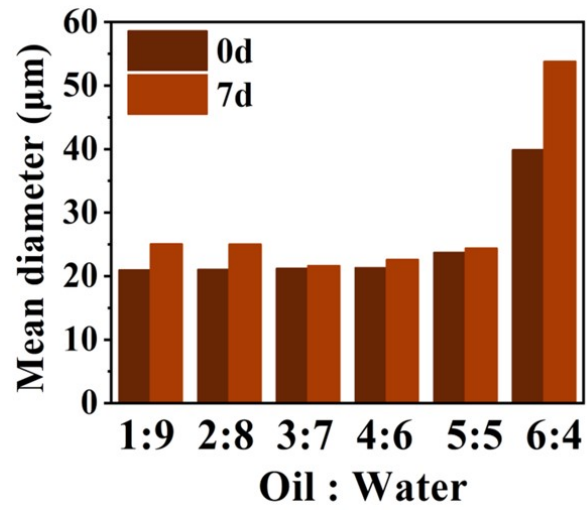

**Figure S2.** Average particle size of Pickering emulsions with different oil-water ratios (mass concentration of 0.08 wt%).

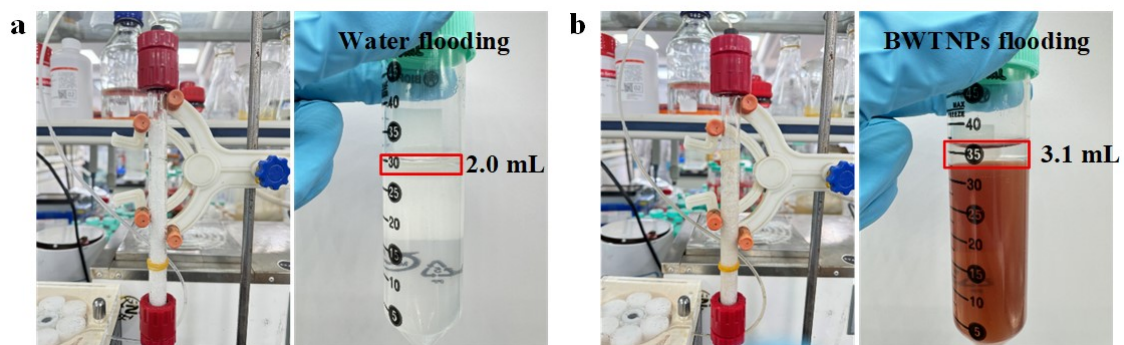

**Figure S3.** (a) Water-flooding white oil setup and its effluent. (b) BWTNP-based emulsifier flooding setup and its effluent.

Table S1. Composition of the Mineralized Water Used in EOR Simulations

| Substances         | $\text{Na}_2\text{CO}_3$ | NaCl   | $\text{Na}_2\text{SO}_4$ | $\text{NaHCO}_3$ | $\text{CaCl}_2$ | $\text{MgCl}_2 \cdot \text{H}_2\text{O}$ |
|--------------------|--------------------------|--------|--------------------------|------------------|-----------------|------------------------------------------|
| Concentration(g/L) | 0.3533                   | 2.8485 | 0.0207                   | 6.4000           | 0.1606          | 0.4500                                   |
